# Supplementary material for: A drug screening assay on cancer cells chronically adapted to acidosis
Source: PubMed Central journal article supplement (PMC6156858; doi:10.1186/s12935-018-0645-5), 2018-09-25
Supplement: 12935_2018_645_MOESM2_ESM.pdf [file 12935_2018_645_MOESM2_ESM.pdf]

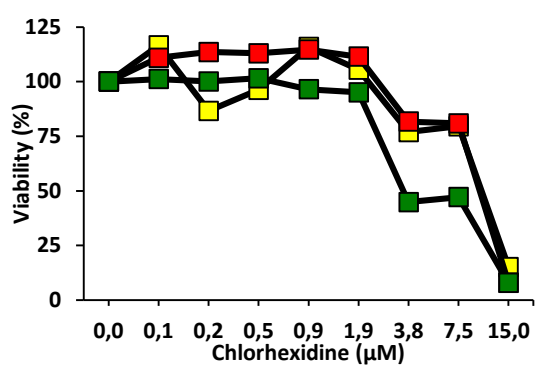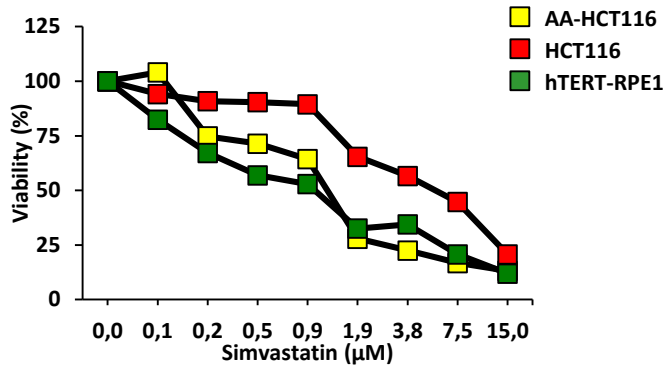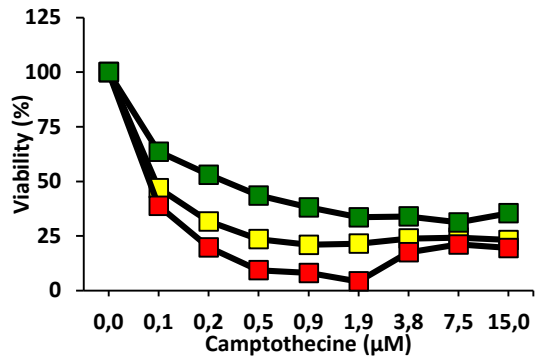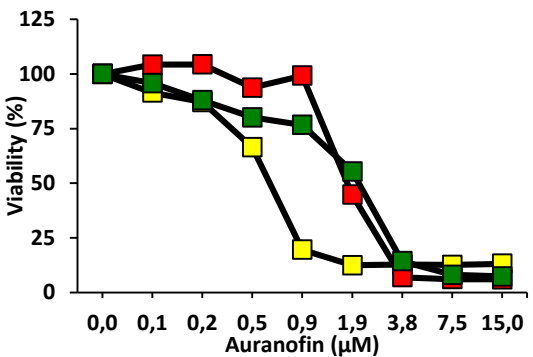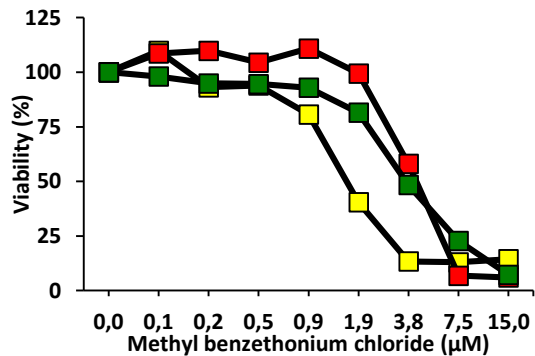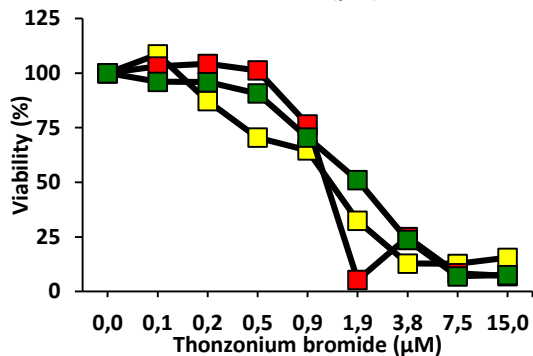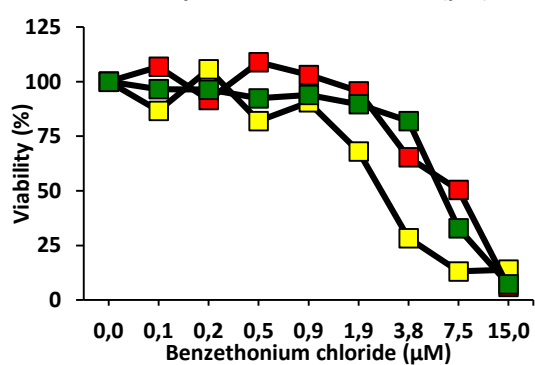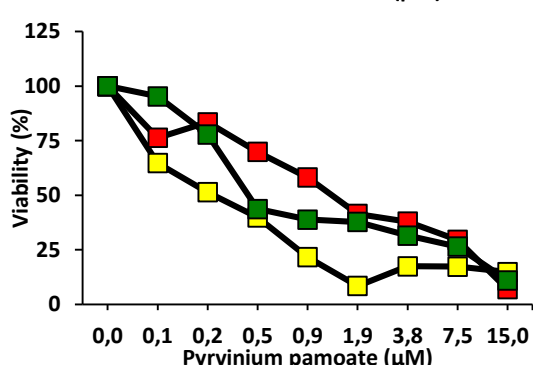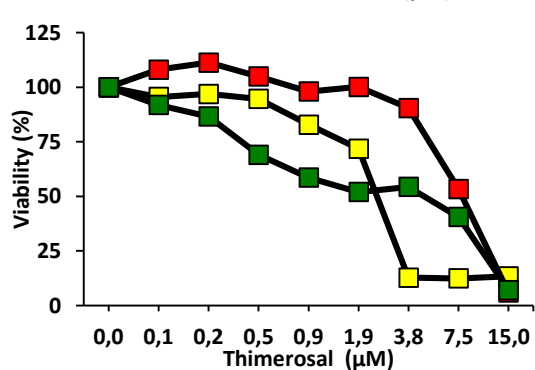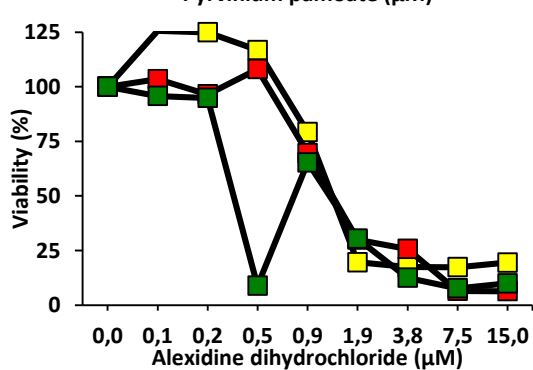

Additional file 2
