# Supplementary material for: A drug screening assay on cancer cells chronically adapted to acidosis
Source: Springer Nature journal article supplement (doi:10.1186/s12935-018-0645-5), 2018-09-25

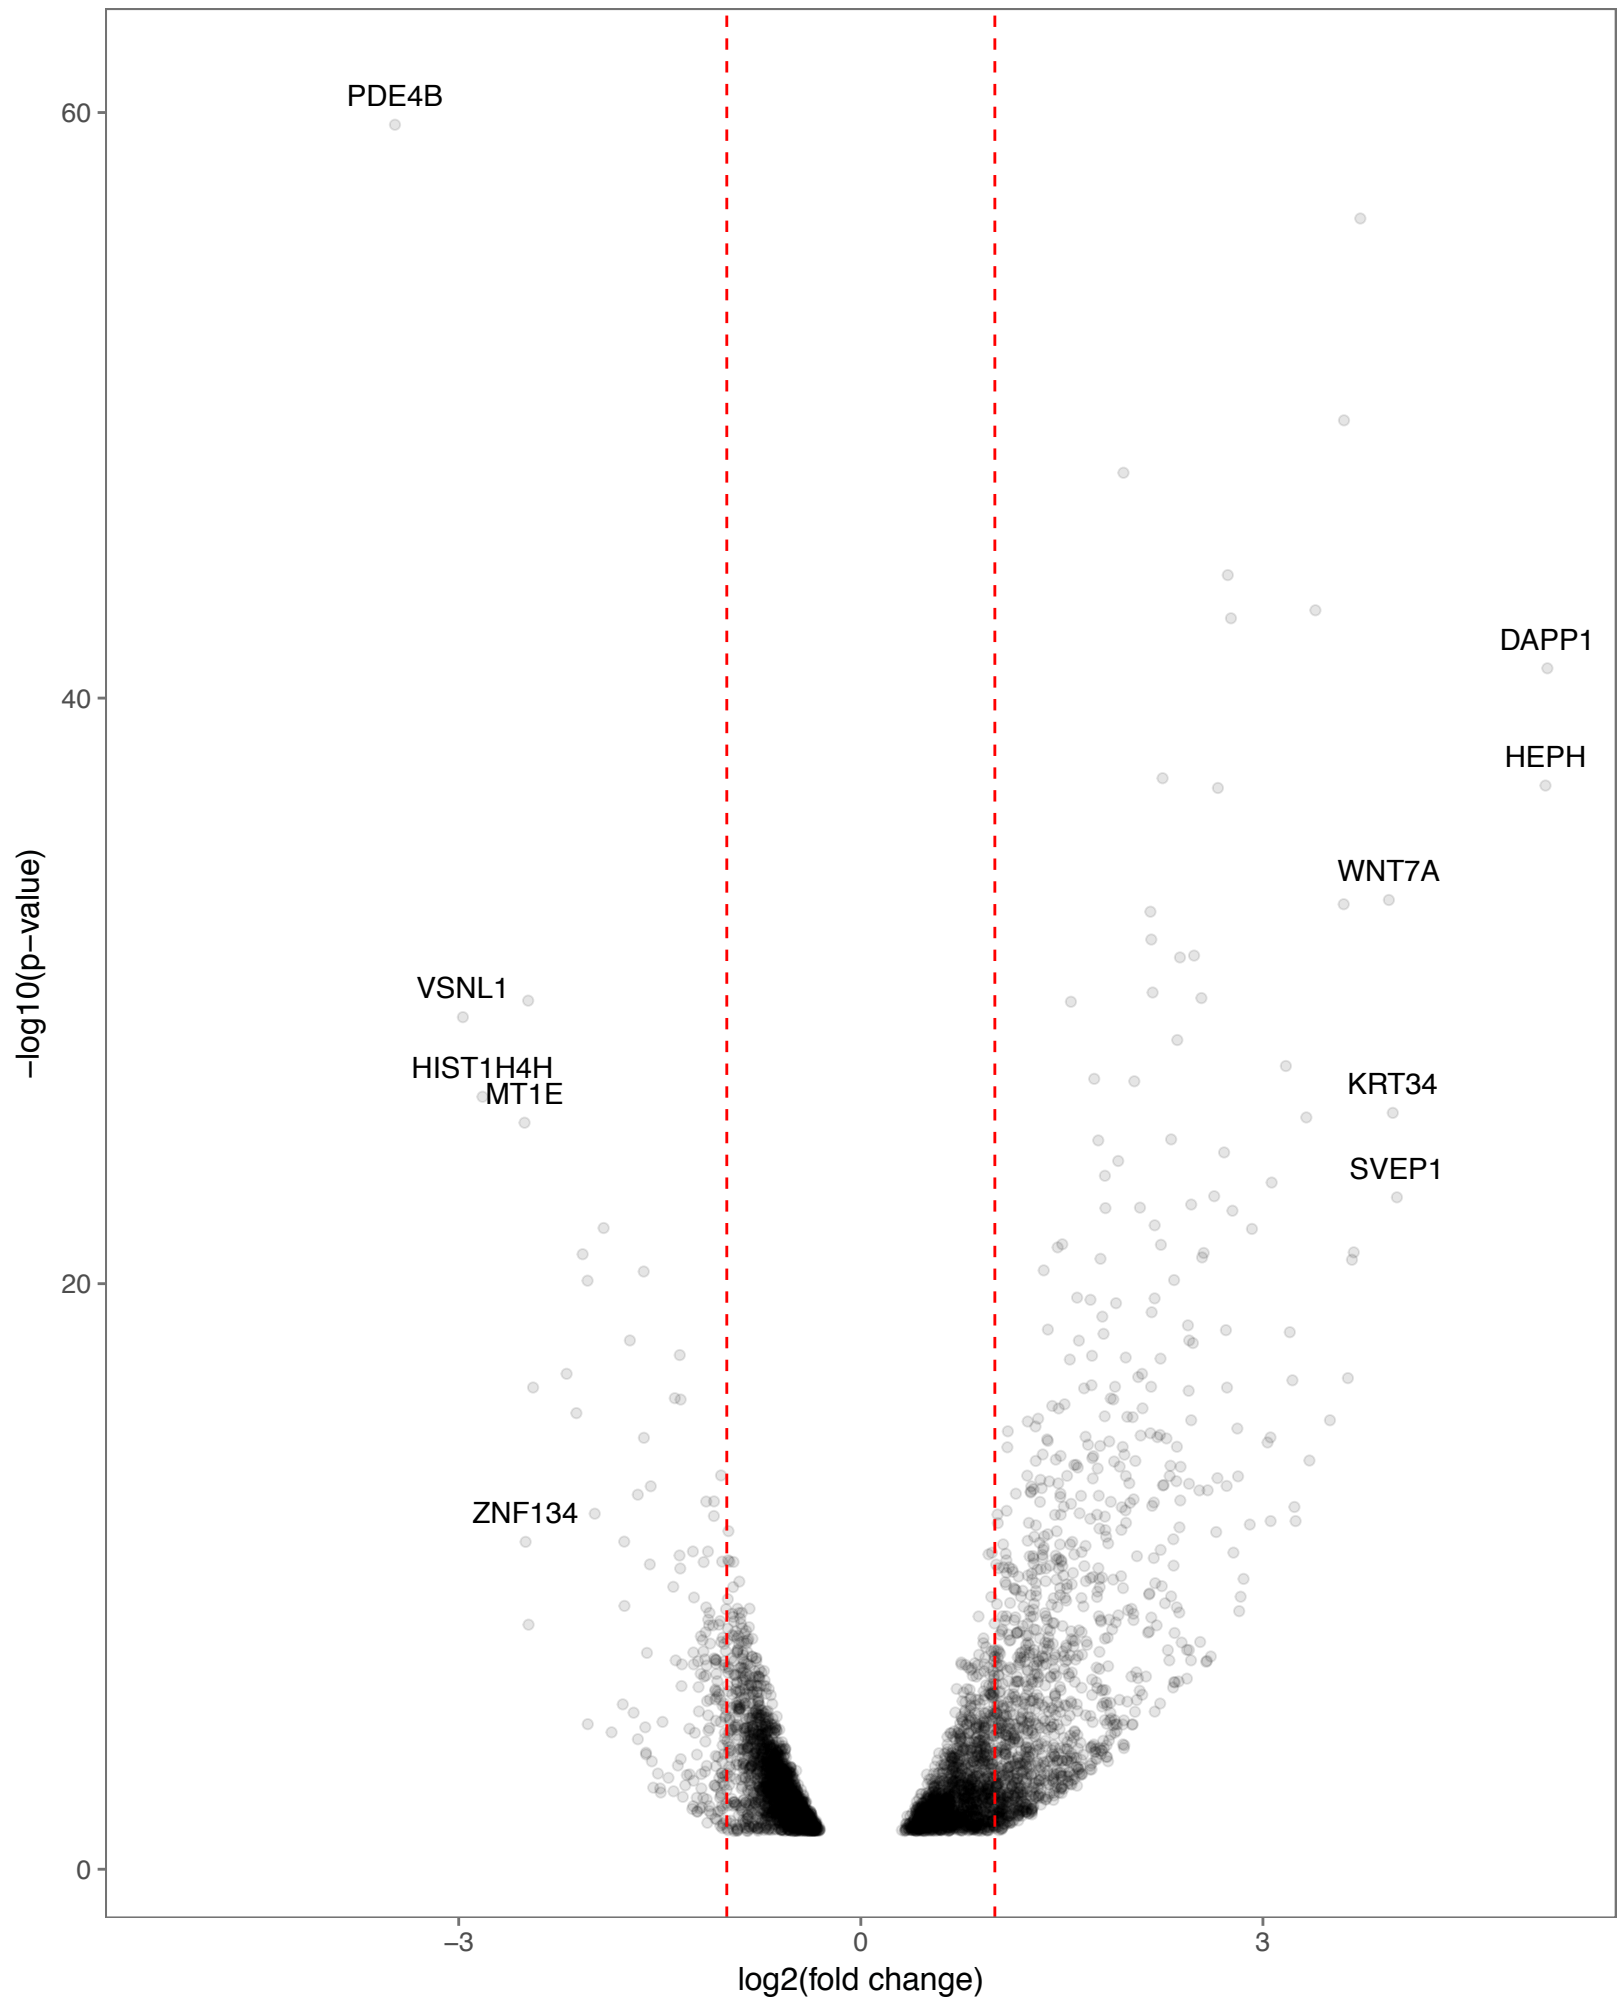

Supplement: MOESM1 [file 16150726]
